# Supplementary material for: The Relationship between Fluid Milk, Water, and 100% Juice and Health Outcomes among Children and Adolescents
Source: MDPI journal article supplement (doi:10.3390/nu14091892), 2022-04-30
Supplement: s1 [file s1]

## Supplementary Figure S1. Results Matrix

This figure provides the desirable (green), undesirable (red), mixed (yellow), or null (grey) findings across the studies included in this literature review. Outcomes are categorized into five overarching groups: macronutrients and micronutrients, dietary aspects and patterns, anthropometrics, biochemical indices, and miscellaneous.

| Outcome Category                                                |                                                                                        |                                                                                        |                                                                                        |                                                                                        |                                                                                         |
|-----------------------------------------------------------------|----------------------------------------------------------------------------------------|----------------------------------------------------------------------------------------|----------------------------------------------------------------------------------------|----------------------------------------------------------------------------------------|-----------------------------------------------------------------------------------------|
| Macronutrients and Micronutrients                               |                                                                                        |                                                                                        |                                                                                        |                                                                                        |                                                                                         |
| <b>Carbohydrates</b><br>(includes % energy from carbohydrates)  |  70   |  48   |  88   |  71   |                                                                                         |
| <b>Fat</b><br>(Total Fat, Fat intake, % energy from fat)        |  48   |  70   |  88   |  74   |  71   |
| <b>Saturated Fat</b><br>(includes % energy from sat. fat)       |  67   |  70   |  88   |  71   |  74   |
| <b>Unsaturated Fat</b><br>(Monounsaturated and polyunsaturated) |  88  |                                                                                        |                                                                                        |                                                                                        |                                                                                         |
| <b>Protein</b><br>(includes % energy from protein)              |  57 |  70 |  84 |  48 |  88 |
| <b>Dietary Fiber</b>                                            |  67 |  70 |  73 |  74 |  71 |

|                                                                                                          |                                                                                                                                                                                                                                                                                                                                                                                                                                                                                                                                                                                                    |
|----------------------------------------------------------------------------------------------------------|----------------------------------------------------------------------------------------------------------------------------------------------------------------------------------------------------------------------------------------------------------------------------------------------------------------------------------------------------------------------------------------------------------------------------------------------------------------------------------------------------------------------------------------------------------------------------------------------------|
| <b>Fat-Soluble Vitamins</b><br>(Vitamin A, E, D)                                                         |                                                                                                                                                                                                                                                                                                                                                 |
| <b>Water-Soluble Vitamins</b><br>(Folate, Vitamin C, B6)                                                 |                                                                                                                                                                                                                                                                                                                                                                                                                                  |
| <b>Minerals</b><br>(Calcium, magnesium, manganese, potassium, sodium, iron, copper)                      |                                                                                           |
| <b>Dietary Aspects &amp; Patterns</b>                                                                    |                                                                                                                                                                                                                                                                                                                                                                                                                                                                                                                                                                                                    |
| <b>Energy Intake*</b><br>(Includes energy intake, Kcal, KJ intake)                                       |        |
| <b>Sugar Intake</b><br>(non-milk extrinsic sugars, total sugar, added sugar, % energy from added sugars) |                                                                                                                                                                         |
| <b>Discretionary Fats</b><br>(Discretionary fat, cholesterol, SOFAAs)                                    |                                                                                                                                                                                                                                                                                                                                                                                                                              |

|                                                                      |                                                                                                                                                                                                                                                                                                                                                                                                                                                                                                                |
|----------------------------------------------------------------------|----------------------------------------------------------------------------------------------------------------------------------------------------------------------------------------------------------------------------------------------------------------------------------------------------------------------------------------------------------------------------------------------------------------------------------------------------------------------------------------------------------------|
| <b>Fruit Intake</b><br>(Includes whole fruit)                        |       |
| <b>Vegetable Intake</b>                                              |                                                                                                                                                                                                                                                             |
| <b>100% Juice Intake</b>                                             |                                                                                                                                                                                                                                                                                                                                              |
| <b>Milk Consumption</b><br>(Includes milk intake, plain milk intake) |                                                                                                                                                                                                                                                             |
| <b>Water Intake</b>                                                  |                                                                                                                                                                                                                                                                                                                                              |
| <b>SSB Intake</b>                                                    |                                                                                                                                                                                                                                                          |
| <b>Diet Beverages</b>                                                |                                                                                                                                                                                                                                                                                                                                          |
| <b>Sweets/Cookies/Fast Food</b>                                      |                                                                                                                                                                                                                                                                                                                                          |

|                                                                                                                                 |                                                                                                                                                                                                                                                                                                                                                                                                                                                                                                                                                                                                                                                                                                                                                                                                                                                                                                                                                                                                                                                                                                                                          |
|---------------------------------------------------------------------------------------------------------------------------------|------------------------------------------------------------------------------------------------------------------------------------------------------------------------------------------------------------------------------------------------------------------------------------------------------------------------------------------------------------------------------------------------------------------------------------------------------------------------------------------------------------------------------------------------------------------------------------------------------------------------------------------------------------------------------------------------------------------------------------------------------------------------------------------------------------------------------------------------------------------------------------------------------------------------------------------------------------------------------------------------------------------------------------------------------------------------------------------------------------------------------------------|
| <b>Cereal Intake</b>                                                                                                            |                                                                                                                                                                                                                                                                                                                                                                                                                                                                                                                                                                                                                                                                                                                                                                                                                                                                                                                                                                        |
| <b>Diet Quality</b><br>(Includes HEI 2005 and 2015)                                                                             |                                                                                                                                                                                                                                                                                                                                                                                                                                                                                                                                                                                                                                                                                                                                                                                                                                                                                                                                                                        |
| <b>Anthropometrics</b>                                                                                                          |                                                                                                                                                                                                                                                                                                                                                                                                                                                                                                                                                                                                                                                                                                                                                                                                                                                                                                                                                                                                                                                                                                                                          |
| <b>Height-related×</b><br>(Includes height, height for age z-score, height z-score)                                             |                                                                                                                                                                                                                                                                                                                                                                                                                                                                                                                                                                                                                                |
| <b>Weight-related</b><br>(Includes body weight, weight for age z-score, weight for height z-score, weight z-score, weight gain) |                                                                                                                                                                                                                                                                                                                                                                                                                                                                                                                                                                                                                                |
| <b>BMI Related Outcomes</b><br>(Includes BMI z-score, BMI percentile)                                                           |              |
| <b>Overweight/Risk of Overweight+</b>                                                                                           |                                                                                                                                                                                                                                                                                                                                                                                                                                                                                                                                                                                                                                                                                                                                                                                                                                                                                 |
| <b>Obesity/Risk of Obesity+</b>                                                                                                 |                                                                                                                                                                                                                                                                                                                                                                                                                                                                                                                                                                                                                                                                                                                                                                                                                                                                                                                                                                                                                                                                                                                                          |

|                                                                                                                |  |
|----------------------------------------------------------------------------------------------------------------|--|
|                                                                                                                |  |
| <b>Body Fat</b><br>(Includes fat mass, body fat, body fat %, skinfold thickness, abdominal obesity)            |  |
| <b>Fat-Free Mass</b>                                                                                           |  |
| <b>Waist Measurements</b><br>(Includes waist to height ratio z-score, waist circumference, waist to hip ratio) |  |
| <b>Risk of Metabolic Syndrome</b>                                                                              |  |
| <b>Biochemical Indices</b>                                                                                     |  |
| <b>24-hour Urine Osmolality</b>                                                                                |  |
| <b>Blood Pressure</b>                                                                                          |  |

|                           |                                                                                        |  |
|---------------------------|----------------------------------------------------------------------------------------|--|
| <b>Apolipoprotein</b>     |  73   |  |
| <b>Blood Glucose</b>      |  73   |  |
| <b>Insulin Levels</b>     |  73   |  |
| <b>Serum Vitamin C</b>    |  73   |  |
| <b>Total Cholesterol</b>  |  61   |  |
| <b>HDL</b>                |  61   |  |
| <b>LDL</b>                |  61  |  |
| <b>Triglycerides</b>      |  61 |  |
| <b>Miscellaneous</b>      |                                                                                        |  |
| <b>Cognitive Function</b> |  85 |  |

|                                  |                                                                                      |                                                                                      |                                                                                      |  |
|----------------------------------|--------------------------------------------------------------------------------------|--------------------------------------------------------------------------------------|--------------------------------------------------------------------------------------|--|
| <b>Physical Activity</b>         |  59 |  77 |  78 |  |
| <b>Dental Caries</b>             |  62 |                                                                                      |                                                                                      |  |
| <b>Bone Strength</b>             |  86 |                                                                                      |                                                                                      |  |
| <b>Cardiorespiratory Fitness</b> |  61 |                                                                                      |                                                                                      |  |

Footnotes:

□ *In this table, we classified higher nutrient density of any macro- or micro-nutrients as desirable.*

\* *In this table, we classified higher energy intake as an undesirable outcome.*

× *In this table, we classified greater height as a desirable outcome.*

+ *In this table, we classified overweight, or obesity has an undesirable outcome.*

∞ *In this table, we classified a higher waist circumference as an undesirable outcome.*

~ *This study looked at low water intake.*
